# Supplementary material for: Deletion of Smooth Muscle O-GlcNAc Transferase Prevents Development of Atherosclerosis in Western Diet-Fed Hyperglycemic ApoE-/- Mice In Vivo
Source: MDPI journal article supplement (doi:10.3390/ijms24097899), 2023-04-26
Supplement: s1 [file s1]

A) The primer sequences used for genotyping and expected size of PCR products are as follows:

1. **OGT**: Mutant: 487 bp; WT: 338 bp  
 F- CAT CTC TCC AGC CCC ACA AAC TG  
 R- GAC GAA GCA GGA GGG GAG AGC AC
2. **ApoE**: Mutant: 245 bp; WT: 155 bp  
 Common GCC TAG CCG AGG GAG AGC CG  
 Wild type Reverse TGT GAC TTG GGA GCT CTG CAG C
3. **Myh11-Cre<sup>ERT2</sup>**: Transgene: 287 bp; Internal positive control: 180 bp  
 Tran F- TGA CCC CAT CTC TTC ACT CC  
 Tran R- AGT CCC TCA CAT CCT CAG GTT  
 Positive control F- CAG CCA ACT TTA CGC CTA GC  
 Positive control R- TCT CAA GAT GGA CCT AAT ACG G

B) PCR Cycling conditions

1. For Cre<sup>tg</sup> and OGT<sup>F</sup>:

| Temperature | Time  | Repetitions               |
|-------------|-------|---------------------------|
| 94°C        | 5 min |                           |
| 94°C        | 20s   | 10X (lower 1C each cycle) |
| 65-55°C     | 15s   |                           |
| 68°C        | 10s   |                           |
| 94°C        | 15s   |                           |
| 60°C        | 15s   | 30X                       |
| 72°C        | 10s   |                           |
| 72°C        | 2 min |                           |
| 15°C        | hold  |                           |

2. For ApoE:

| Temperature | Time  | Repetition |
|-------------|-------|------------|
| 94°C        | 4 min |            |
| 94°C        | 30s   | 35X        |
| 69°C        | 1 min |            |
| 72°C        | 1 min |            |
| 72°C        | 2 min |            |
| 15°C        | hold  |            |

**Supplementary Figure S1.** Primer sequences and PCR conditions for mice genotyping. A) Shown are the primer sequences used for OGT, ApoE and Myh11-Cre<sup>tg</sup> genotyping, B) PCR cycling conditions used for mice genotyping.

### A. Primer sequences utilized for qPCR reactions:

|    | Gene         | Forward                         | Reverse                        |
|----|--------------|---------------------------------|--------------------------------|
| 1  | <i>Acta2</i> | 5'- CATCTTTCATTGGGATGGAG- 3'    | 5'- TTAGCATAGAGATCCTTCCTG- 3'  |
| 3  | <i>Myocd</i> | 5'- GATGGGCTCTCTCCAGATCAG- 3'   | 5'- GGCTGCATCATTCTTGTCACTT- 3' |
| 4  | <i>Myh11</i> | 5' TATCTTCTGGAAAAGTCTAGGG- 3'   | 5'- AAAGCAGGTCACCTTTTCATC- 3'  |
| 6  | <i>36b4</i>  | 5'- AGATTCTGGGATATGCTGTTGG – 3' | 5'- TCGGGTCCTAGACCAGTGTTC – 3' |
| 7  | <i>18s</i>   | 5'- TTGACGGAAGGGCACCACCAG- 3'   | 5'- GCACCACCACCCACGGAATCG- 3'  |
| 8  | <i>OGT</i>   | 5'- GACGCAACCAAACCTTTGCAGT-3'   | 5'-TCAAGGGTGACAGCCTTTTCA- 3'   |
| 9  | <i>Cnn1</i>  | 5'- TGCTGAAGTAAAGAACAAGC- 3'    | 5'- CATTGACCTTCTTCACAGAAC- 3'  |
| 10 | <i>Il6</i>   | 5'- TAGTCCTTCCTACCCCAATTTC- 3'  | 5'- TTGGTCCTTAGCCACTCCTTC- 3'  |
| 11 | <i>Il1β</i>  | 5'- TGTAATGAAAGACGGCACACC- 3'   | 5'- TCTTCTTTGGGTATTGCTTGG- 3'  |

### B. qPCR cycling conditions

| Thermal Cycler Profile |             |             |             |
|------------------------|-------------|-------------|-------------|
| Stage                  | Repetitions | Temperature | Time (mins) |
| 1                      | 1           | 50.0 °C     | 2:00        |
| 2                      | 1           | 95.0 °C     | 10:00       |
| 3                      | 40          | 95.0 °C     | 0:15        |
|                        |             | 60.0 °C     | 1:00        |
| 4 (Dissociation)       | 1           | 95.0 °C     | 0:15        |
|                        |             | 60.0 °C     | 0:20        |
|                        |             | 95.0 °C     | 0:15        |
|                        |             | 60.0 °C     | 0:15        |

**Supplementary Figure S2.** Real-time PCR conditions. A) qPCR primer sequences and B) qPCR cycling conditions.

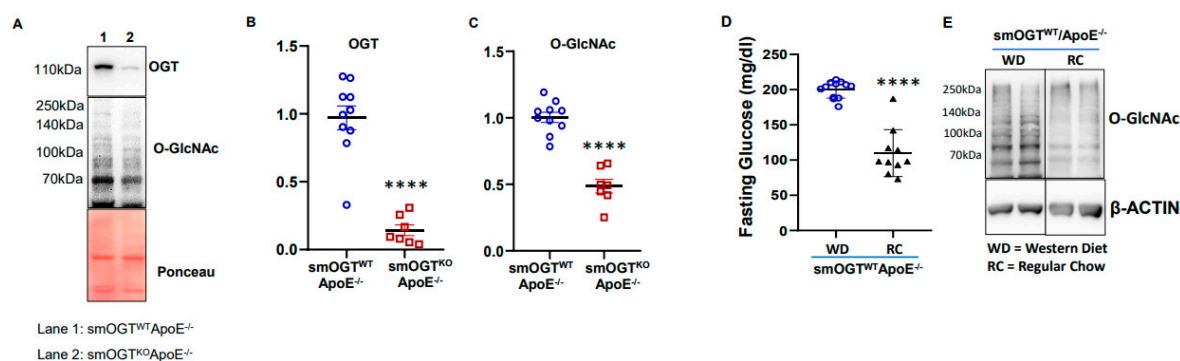

**Supplementary Figure S3.** (A-C) Validation of SMC-specific OGT deletion in ApoE<sup>-/-</sup> mice. Aortic lysates derived from smOGT<sup>WT</sup>ApoE<sup>-/-</sup> and smOGT<sup>KO</sup>ApoE<sup>-/-</sup> mice were subjected to immunoblotting. Shown are representative immunoblots and corresponding summary graphs depicting fold-change in protein expression normalized to Ponceau S for total protein staining. D-E) Western diet feeding increases fasting blood glucose levels accompanied with increased O-GlcNAc protein expression in the aortic vessels of smOGT<sup>WT</sup>ApoE<sup>-/-</sup> mice. n=7-11 mice per group, \*\*\*\*p<0.0001.

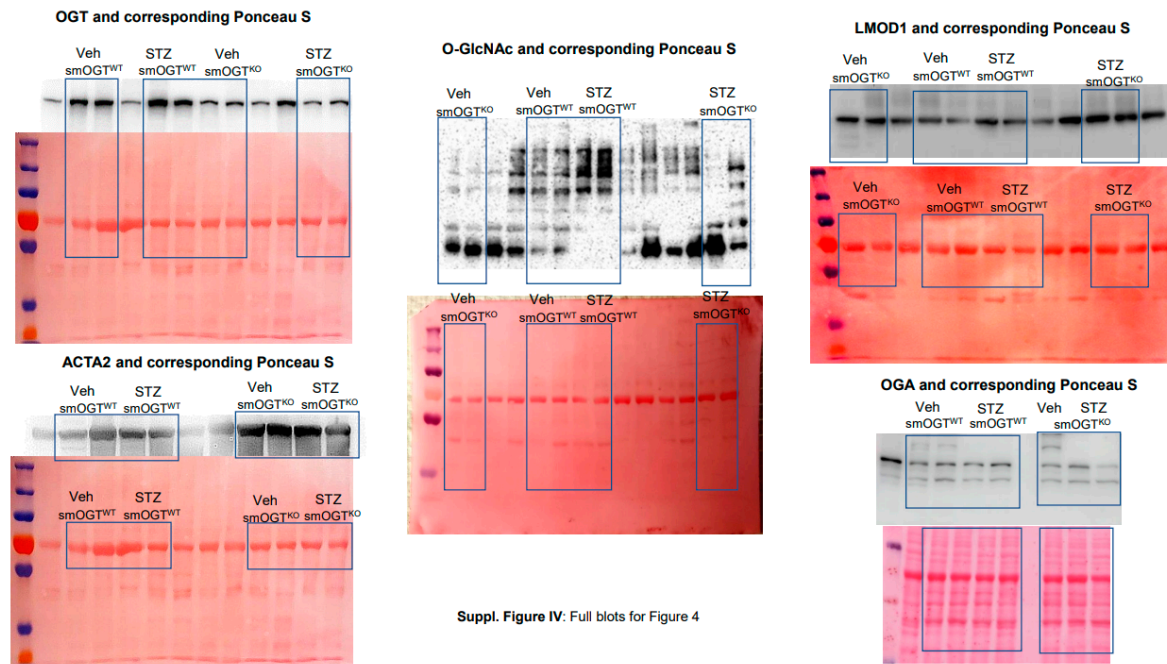

**Supplementary Figure S4.** Full blots for Figure 4 images. Blue box outlines the bands used in the corresponding images.

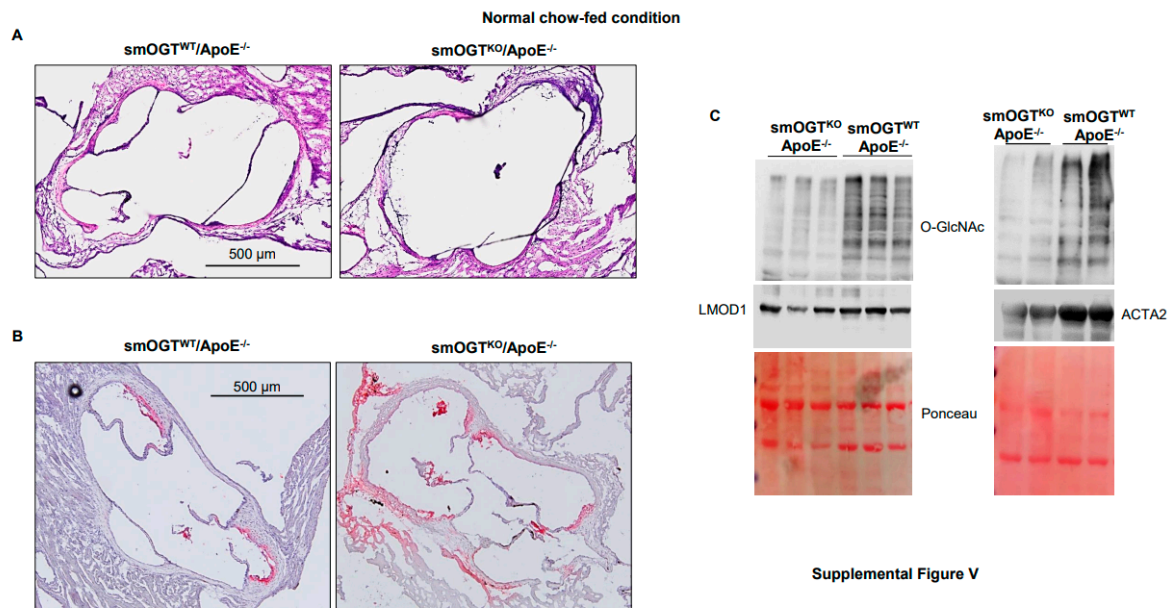

**Supplementary Figure S5.** Plaque area, lipid burden and SM contractile marker expression in normal chow-fed smOGT<sup>WT</sup>ApoE<sup>-/-</sup> and smOGT<sup>KO</sup>ApoE<sup>-/-</sup> mice. Shown are representative A) hematoxylin & eosin (H&E)- and B) Oil red O-stained images of aortic root sections derived from 14-wks old normal chow-fed smOGT<sup>WT</sup>ApoE<sup>-/-</sup> and smOGT<sup>KO</sup>ApoE<sup>-/-</sup> mice. Representative immunoblots of aortic lysates from normal chow-fed smOGT<sup>WT</sup>ApoE<sup>-/-</sup> and smOGT<sup>KO</sup>ApoE<sup>-/-</sup> mice depicting O-GlcNAc, LMOD1 and ACTA2 expression are shown in panel C); Ponceau S shows total protein staining.

**Supplementary material:** The following Supplemental data are included in this manuscript: Supplementary Figures S1-S5.
